# Supplementary material for: Psychrophilic Yeasts: Insights into Their Adaptability to Extremely Cold Environments
Source: MDPI journal article supplement (doi:10.3390/genes14010158), 2023-01-06
Supplement: s1 [file s1]

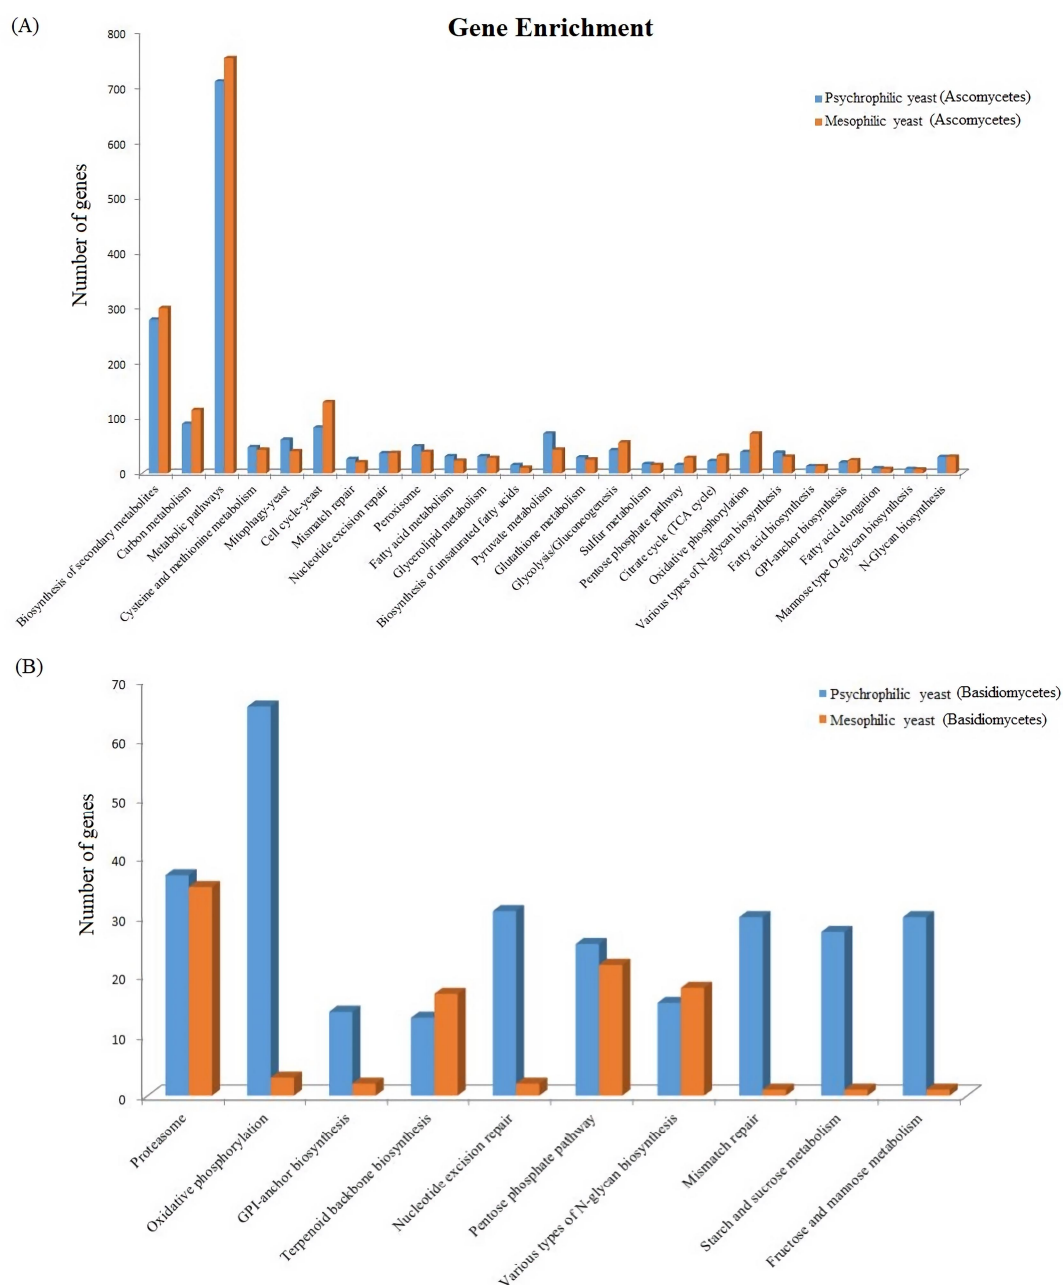

**Supplementary Figure S1.** Gene enrichment of different fungi: Ascomycetes (A) and Basidiomycetes (B).

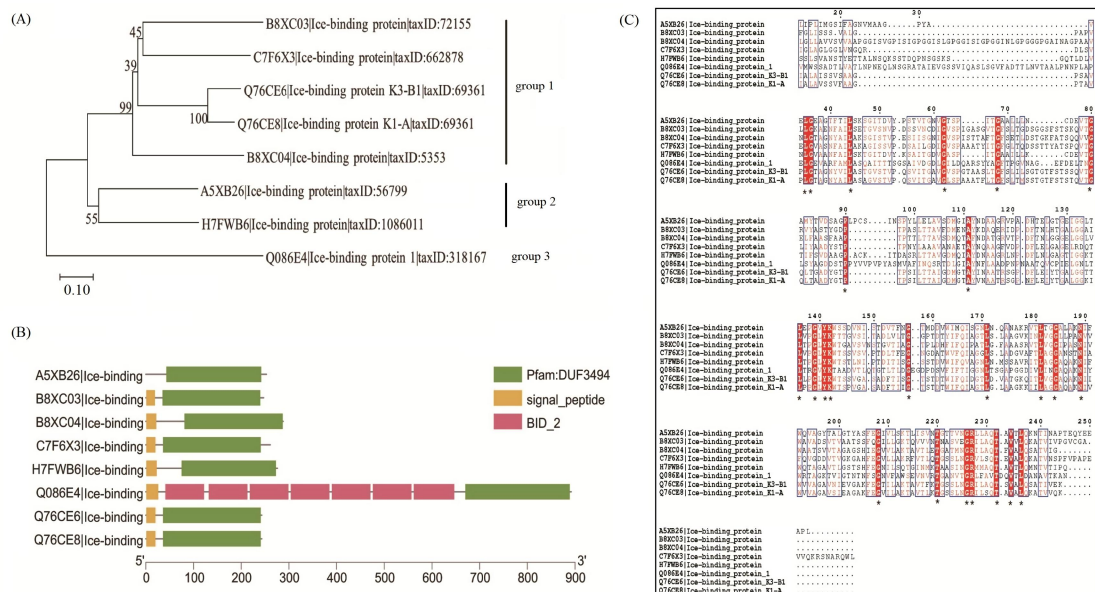

**Supplementary Figure S2.** The phylogenetic tree (A), domains (B), and sequence alignments (C) of the reported antifreeze proteins (AFPs). Highly conserved residues are highlighted in red
